# Supplementary material for: OsLRR-RLP2 Gene Regulates Immunity to Magnaporthe oryzae in Japonica Rice
Source: MDPI journal article supplement (doi:10.3390/ijms25042216), 2024-02-12
Supplement: s1 [file s1]

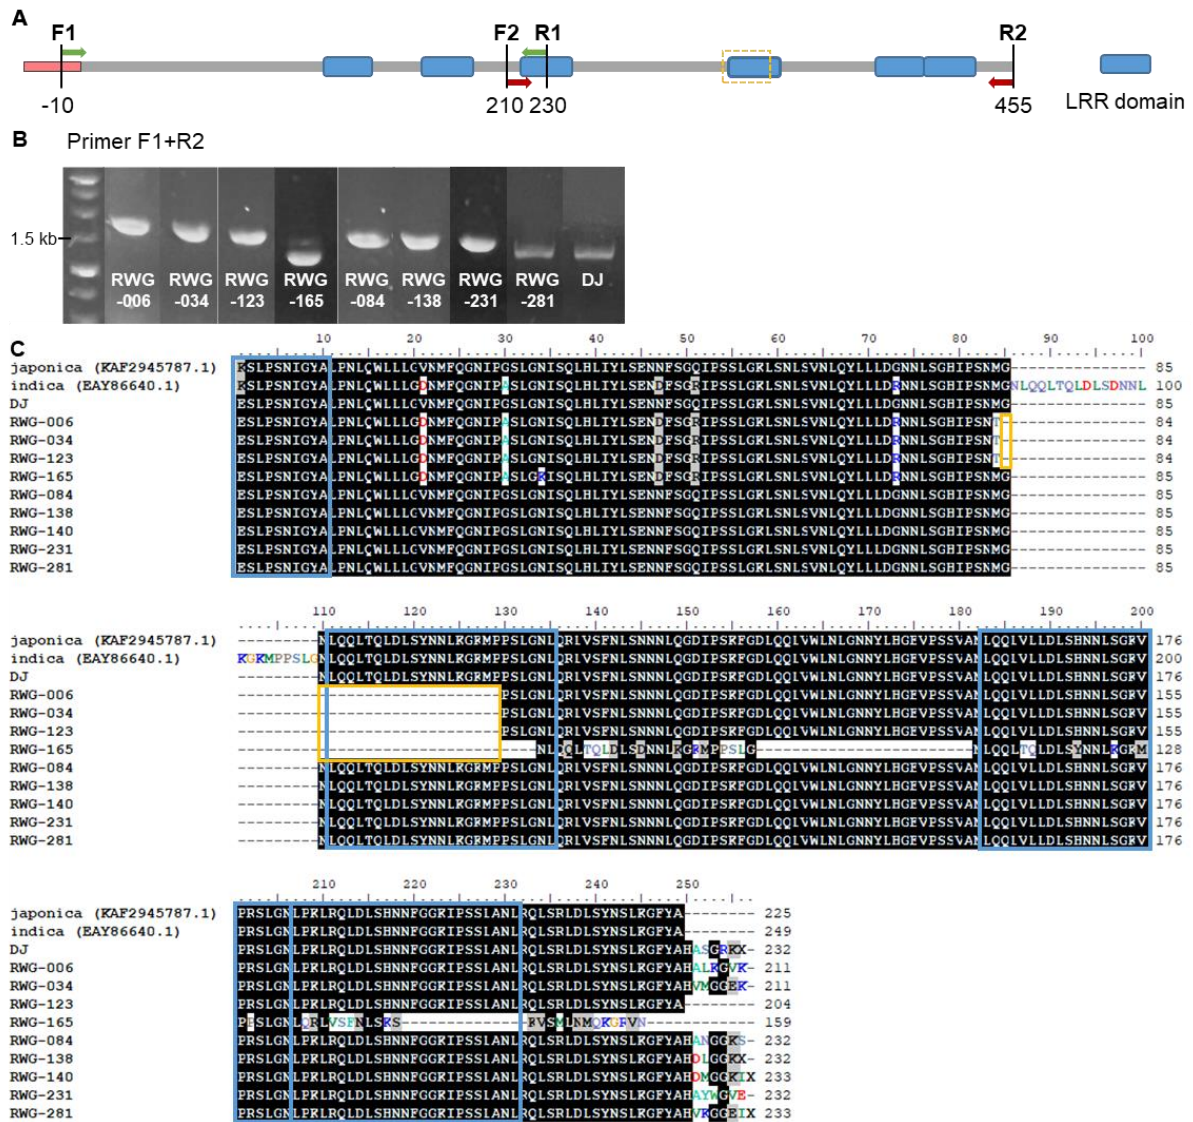

**Figure S1.** Amino acid sequence analysis of RWG lines at DNA level. (A) Position of primers used to assess the genotype of *OsLRR-RLP2*. Blue boxes indicate LRR domains. Yellow box indicates nonconserved amino acid residues in some RWG lines. Red box indicates upstream of *OsLRR-RLP2* gene. (B) PCR-based confirmation of DJ and 9 RWG lines using F1 and R2 primers. Lane 1: 1.5 kb DNA ladder. (C) *OsLRR-RLP2* sequence confirmation of 9 RWG lines using F2 and R2 primers. Lines 4 to 7 are *indica* species, and lines 8 to 12 are *japonica* species. Blue boxes indicate LRR domain. Yellow boxes indicate nonconserved amino acid residues.

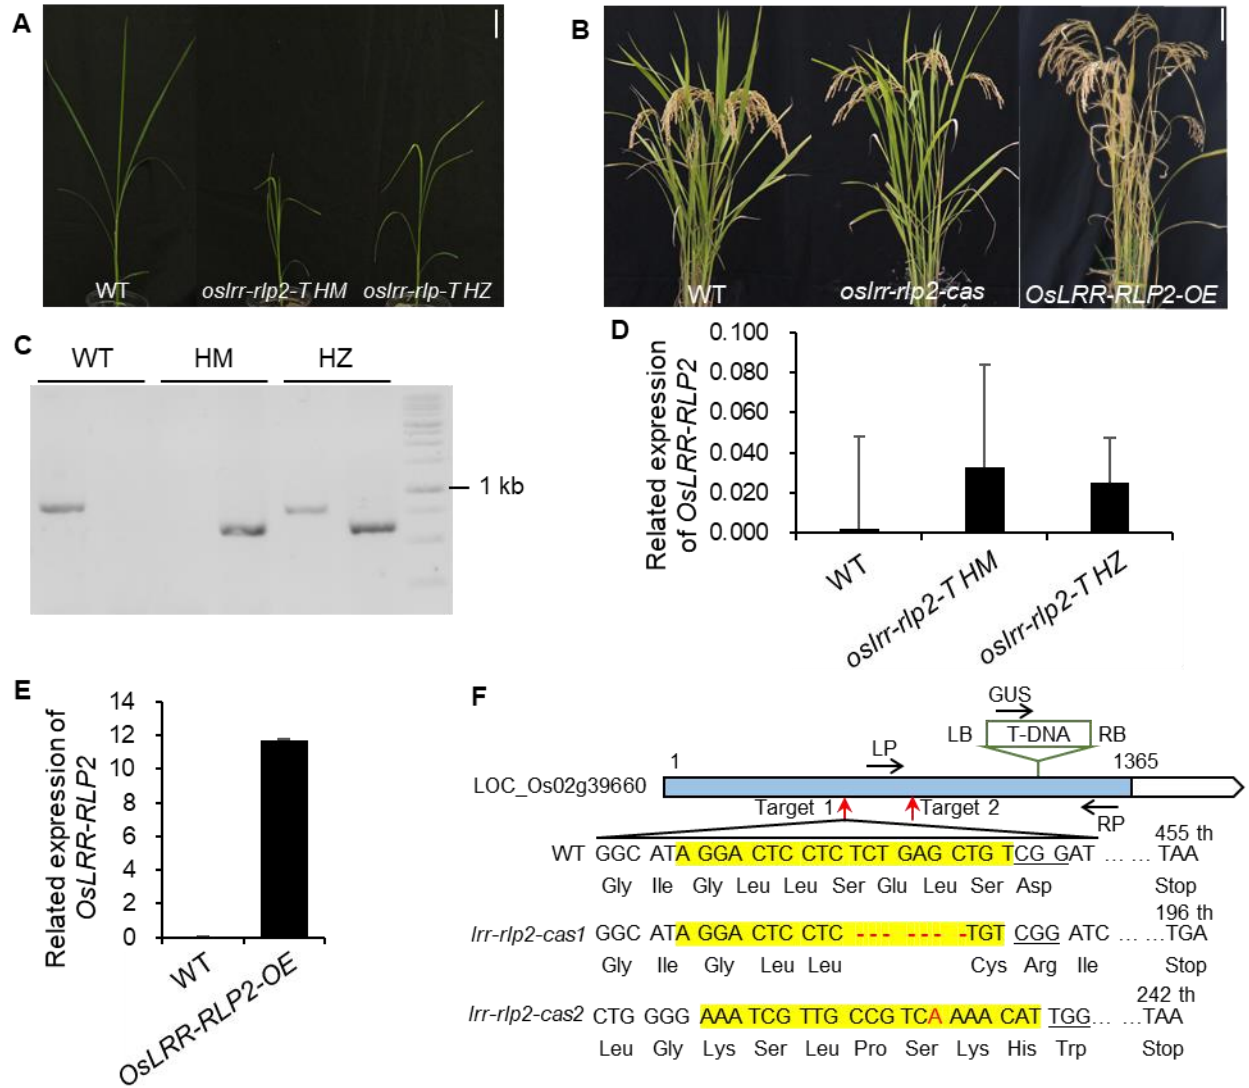

**Figure S2.** Generation of *OsLRR-RLP2* transgenic plants. **(A)** The phenotypes of WT, *oslrr-rlp2* T-DNA HM, and *oslrr-rlp2* T-DNA HZ. Scale bar = 5 cm. WT, wild-type; *oslrr-rlp2*-T HM, *oslrr-rlp2* T-DNA homozygous; *oslrr-rlp2*-T HZ, *oslrr-rlp2* T-DNA heterozygous. **(B)** The phenotypes of CRISPR/Cas9 and overexpressed plants at 4 months. Scale bar = 10 cm. WT, wild-type. **(C)** PCR genotyping analysis of T-DNA insertion mutant plants. Using genomic DNA as the template, PCR with internal primers was conducted for WT and T-DNA insertion mutants. Lane 7: 1 kb DNA ladder. **(D)** qRT-PCR analysis of *OsLRR-RLP2* gene expression level in T-DNA insertion mutant lines. Three technical replicates were performed, and error bars indicate  $\pm$  SD. **(E)** qRT-PCR analysis of *OsLRR-RLP2* gene expression level in WT and *OsLRR-RLP2-OE*. The leaves were subjected to RNA extraction. Three technical replicates were performed, and error bars indicate  $\pm$  SD. **(F)** Generation of homozygous mutant of *OsLRR-RLP2* through gene editing using CRISPR/Cas9 and T-DNA insertion (green box). Two target sites were disrupted in the first exon. Insertions and deletions (indels) are indicated in red arrow. T-DNA insertion homozygous plants were screened by PCR using LP, RP, and GUS primer. LP, Left primer; RP, Right primer.

**Table S1.** List of 9 accessions used for *M. oryzae* test, which contained OsLRR-RLP2 indels.

| Cultivar name      | Subspecies         | Origin | Type          | Line number | Indel number |
|--------------------|--------------------|--------|---------------|-------------|--------------|
| CT9993-5-10-1-M    | Indica             | COL    | Introduction  | RWG-006     | 63           |
| BALA               | Indica             | IND    | Introduction  | RWG-034     | 63           |
| Chungdo Hwayang 14 | Indica             | KOR    | Weedy         | RWG-123     | 72           |
| Milyang 23         | Indica             | KOR    | Breeding line | RWG-165     | 72           |
| Syalebyeo-163-1-B  | Temperate japonica | KOR    | Weedy         | RWG-084     | 0            |
| Jinbu Byeo         | Temperate japonica | KOR    | Breeding line | RWG-138     | 0            |
| Hopyung            | Temperate japonica | KOR    | Breeding line | RWG-140     | 0            |
| Gangchan           | Temperate japonica | KOR    | Breeding line | RWG-231     | 0            |
| Jinbaek            | Temperate japonica | KOR    | Breeding line | RWG-281     | 0            |

**Table S2.** The primers used in this study.

| Primer name      | Forward primer sequense (5' to 3') | Reverse primer sequense (5' to 3') | Objective  |
|------------------|------------------------------------|------------------------------------|------------|
| OsLRR-RLP2_F1/R1 | TGCTTTACCACTGTGCAGGT               | TGGAGATGAATTTTCTGGGG               | Genotyping |
| OsLRR-RLP2_F2/R2 | GCGCCCTTTATAATCTCTCTTC             | AACATGCCATTAGTGCGTGA               | Genotyping |
| OsLRR-RLP2_T-DNA | TTATCTCTCGGGGCACATTC               | CAAGCGACTGAGTTGACGAA               | Genotyping |
| GUS              | AACGCTGATCAATTCCACAG               |                                    | Genotyping |
| OsLRR-RLP2_qRT   | TCAGGACACATACCGTCCAA               | CTTCAGCGGCTAGTGAGCTT               | qRT-PCR    |
| OsUbiquitin      | GCACAAGCACAGAAGGTGA                | GCCTGCTGGTTGTAGACGTA               | qRT-PCR    |
| OsMoPot2         | ACGACCCGTCTTTACTTAITTTGG           | AAGTAGCGTTGGTTTTGTTGGAT            | qRT-PCR    |
